# Supplementary material
Source: PubMed Central journal article supplement (PMC4366281)
Supplement: NIHMS650529-supplement-1.pdf [file NIHMS650529-supplement-1.pdf]

## SUPPLEMENTARY INFORMATION

**Compounds targeting disulfide bond forming enzyme DsbB of  
multiple Gram-negative bacteria**

**Cristina Landeta<sup>a,°</sup>, Jessica L. Blazyk<sup>a,°</sup>, Feras Hatahet<sup>a,°</sup>, Brian M. Meehan<sup>a</sup>,  
Markus Eser<sup>a</sup>, Alissa Myrick<sup>b</sup>, Ludmila Bronstain<sup>c</sup>, Shoko Minami<sup>b</sup>,  
Holly Arnold<sup>f</sup>, Na Ke<sup>e</sup>, Eric J. Rubin<sup>b</sup>, Barbara C. Furie<sup>c</sup>, Bruce Furie<sup>c</sup>, Jon  
Beckwith<sup>a,\*</sup>, Rachel Dutton<sup>d</sup> and Dana Boyd<sup>a</sup>**

## SUPPLEMENTARY RESULTS

### Supplementary Figures

**Supplementary Figure 1.** Screening-plate example. A 384-multiwell plate filled with agar growth media plus chemical compounds and inoculated with *E. coli* strain expressing  $\beta$ -Gal<sup>dsb</sup>. A strong positive hit shows up as a dark blue well; a weak positive hit shows up as light blue and a negative hit as white. The positive control strain is an *E. coli* dsbB mutant expressing  $\beta$ -Gal<sup>dsb</sup> (last blue-well column).

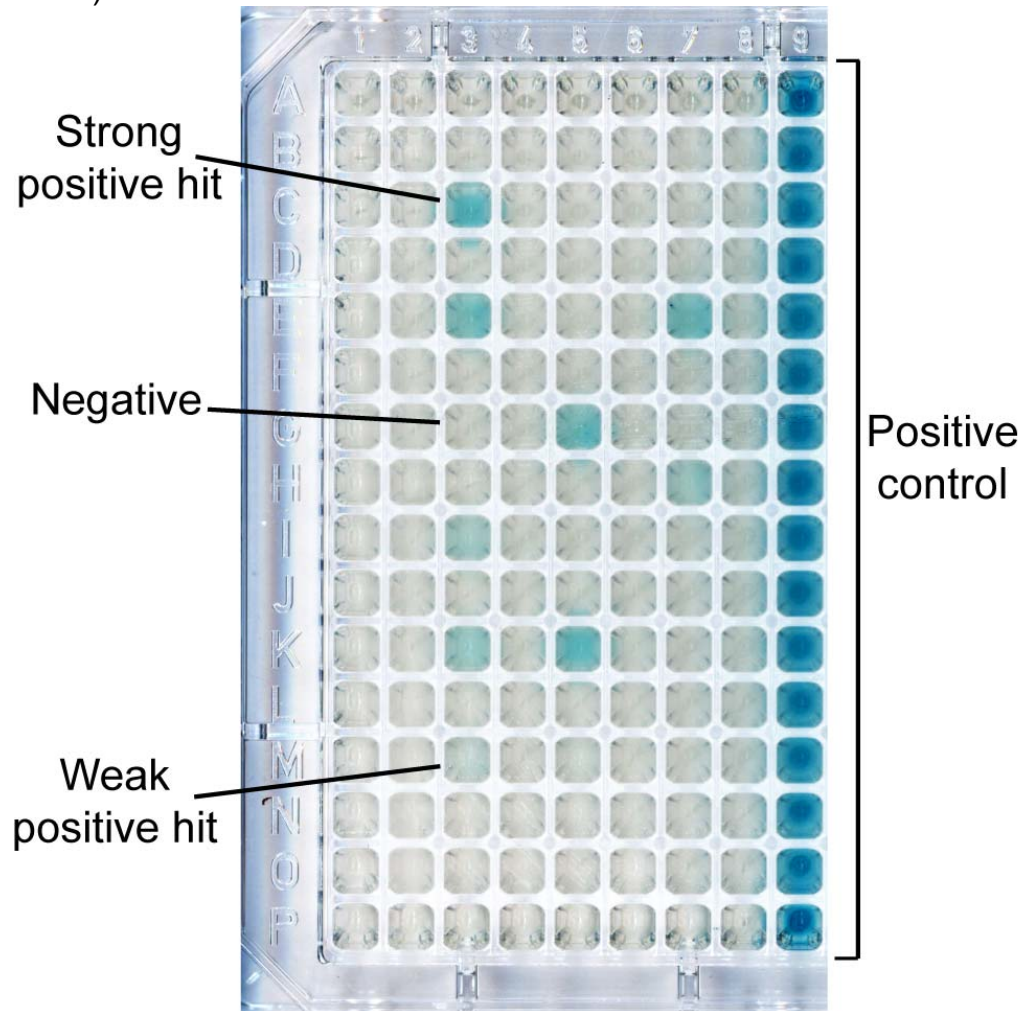

**Supplementary Figure 2.** Inhibition of mouse VKOR and human PDI by compound 1. (a) Effect of compound 1 on the activity of VKOR preparations from mouse liver microsomes by quantification of the reduction of vitamin K epoxide to vitamin K. Values represent the average of two independent experiments  $\pm$  SD. (b) The effect of indicated concentrations of compounds 1 (circles) and 12 (squares) on the activity of PDI was measured by the insulin reduction assay. Values represent the average of three independent experiments  $\pm$  SD.

**a.**

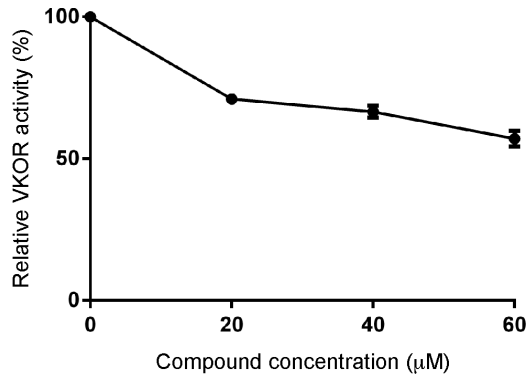

**b.**

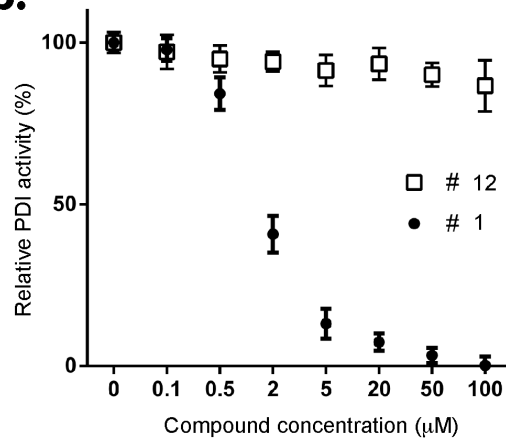

**Supplementary Figure 3.** Dixon plots of DsbB activity (a)with compound 9, values represent the average of three independent experiments and (b)with compound 12, values represent the average of two independent experiments. See description of details in Online Methods.

**a.**

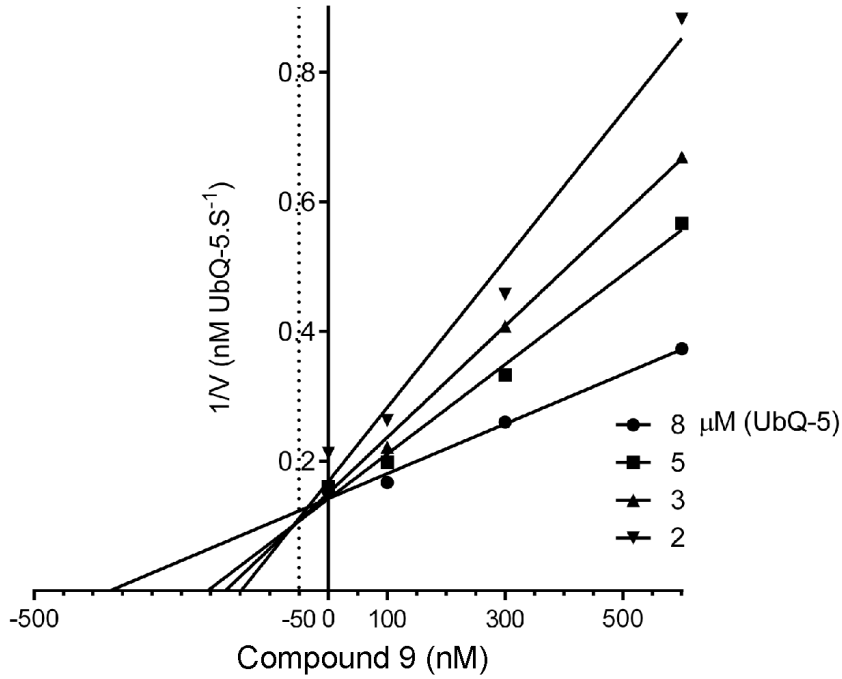

**b.**

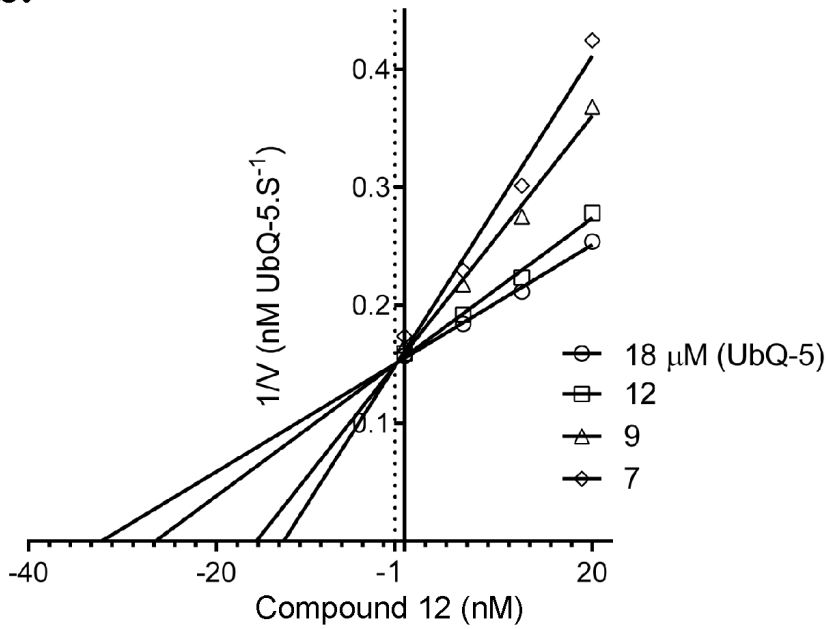

**Supplementary Figure 4.** Mechanism of inhibition by compound 12. (a) *In vivo* accumulation of reduced DsbB when incubating cells with compound 12. Cells were grown aerobically with different concentrations of drug and precipitated proteins were treated with Maleimide-PEG2k (ME2k, 2kDa). Samples were run on reducing SDS-PAGE and immunoblotted against anti-DsbB. Dithiothreitol (DTT) was used for reducing disulfide bonds prior to alkylation. “oxidized” refers to the position of the oxidized protein which is the same as that of the protein with all four cysteines (Cys) mutated. “Reduced” refers to bands where the positions of the protein with the four or indicated number of reduced cysteines are detected due to alkylation which adds to the molecular weight. Gel shown is a representative immunoblot of two independent experiments. (b) Visible absorbance spectra of DsbB and DsbB-DsbA<sub>C33A</sub> dimer. The pink color of the DsbB-ubiquinone charge-transfer complex diminishes when compound 12 is added, indicating disruption of the interaction between Cys44 of DsbB and the cofactor ubiquinone. DsbB or DsbB-DsbA<sub>C33A</sub> complex (each at 100 μM) were mixed with compound 12 (or with DMSO) at 1:2 molar ratio in 50 mM Tris buffer pH 8.0 containing 300 mM NaCl and 0.05% DDM. Samples were incubated on ice for about 4 minutes before the spectra were recorded using 1 cm quartz cuvettes. (c) Summary of deconvoluted masses obtained from ESI-MS analysis of proteins treated with compound 12 (last column). (d) MS/MS fragmentation of DsbB peptide C\**IYERVAL*. Sequencing ions of the modified (44-51)-peptide gave information consistent with modification of Cys44 by compound 12. The calculated monoisotopic mass of modified b5 ion (residues 44-48, CIYER) is 917.293 Da and the observed mass is 917.295 Da. The calculated mass of the unmodified peptide is 664.300 Da. Thus the mass difference is 252.995 Da which is in agreement with the loss of a chloride ion from 12 upon binding to Cys44, 287.962 (mass of compound 12) - 34.969 (mass of chloride ion) = 252.993 Da.

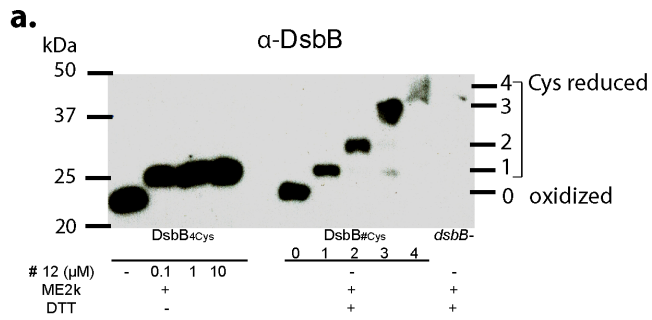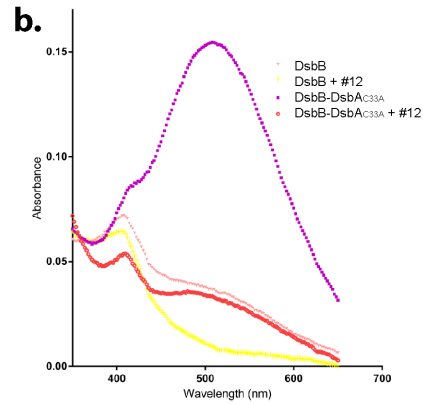

**c.**

| Protein(s)                      | Theoretical calculated mass (Da) <sup>a</sup> | DMSO CONTROL Observed mass (Da)          | COMPOUND 12 (Mw 289.54) Observed mass (Da) Mass difference (Da) |       |
|---------------------------------|-----------------------------------------------|------------------------------------------|-----------------------------------------------------------------|-------|
| DsbB                            | 21168.17 (4 cys, disulfide bonded)            | 21200.6 (+2 ox b)                        | No change                                                       | -     |
| DsbAc <sub>33A</sub>            | 22111.04                                      | 21984.7 (initiation methionine cleavage) | No change                                                       | -     |
| DsbB-DsbAc <sub>33A</sub> Dimer | 43279.21                                      | 43187.1 (initiation methionine cleavage) | 43440.7                                                         | 253.6 |
| DsbA reduced                    | 22143.16                                      | 22012.6 (initiation methionine cleavage) | No change                                                       | -     |

<sup>a</sup> Masses are +/- 2 Da.  
<sup>b</sup> Ox stands for addition of 16 Da oxidation.

**d.**

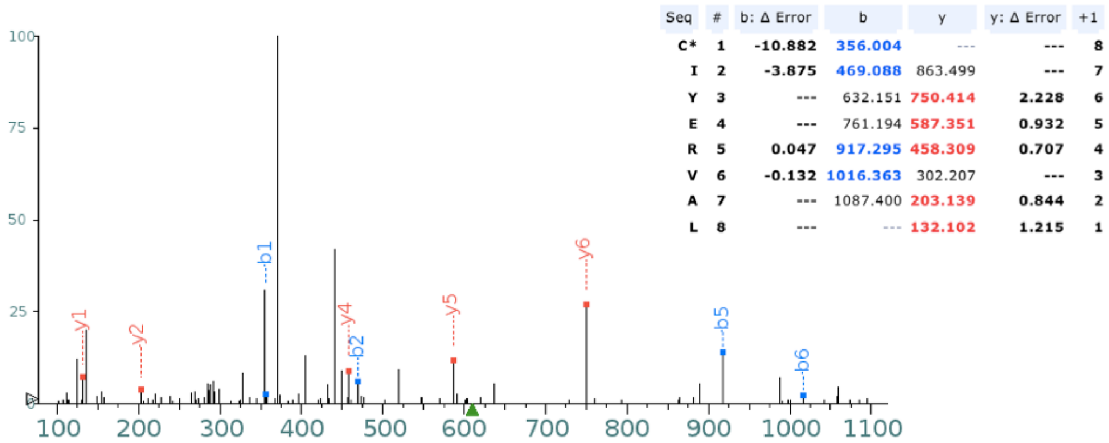

**Supplementary Figure 5.** Inhibition of *Pseudomonas aeruginosa* twitching motility by compound 12. Motility of *P. aeruginosa* on a hard and thin-layer of M63 minimal media was tested in the absence (left) or presence (right) of compound 12. The picture shows 10 cm-petri plates and is representative of three independent experiments.

*Pseudomonas aeruginosa* PA14

#12 (50 $\mu$ M):

-

+

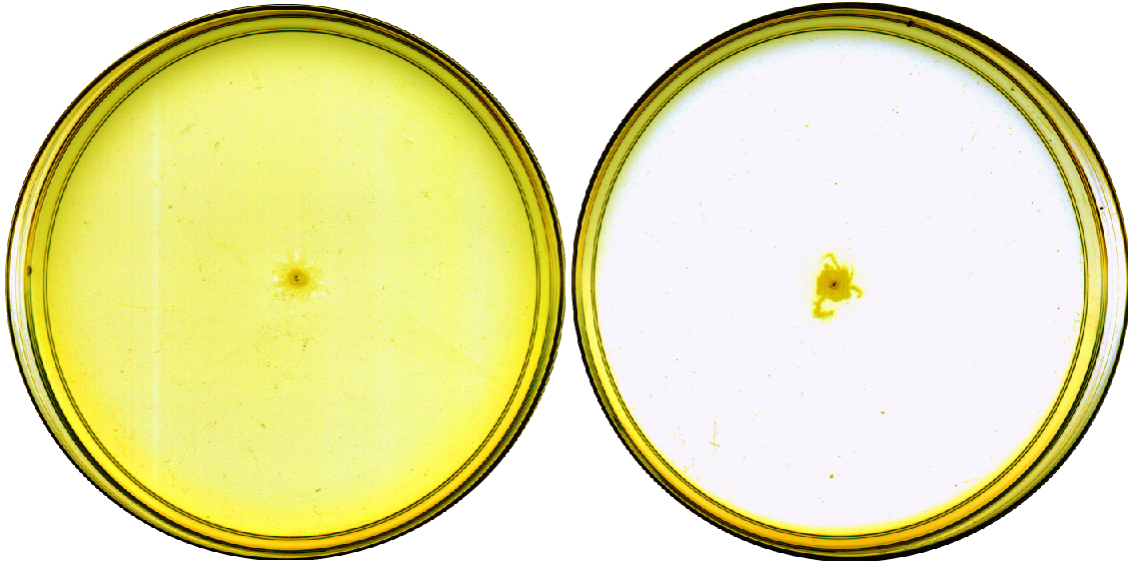

# Supplementary analysis of compound 12 purity.

Purity of compound 12: 95%, assessed by HPLC-MS (Vendor and ICCB) and NMR (Vendor).

MaxPeak: 100.00%  
Ret\_Time: 1.354 min

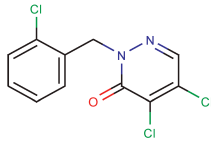

Mol Wt 289.54  
Exact Mass 287.97

| # | Time  | Area%  |
|---|-------|--------|
| 1 | 1.354 | 100.00 |

6659123\$2

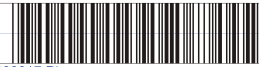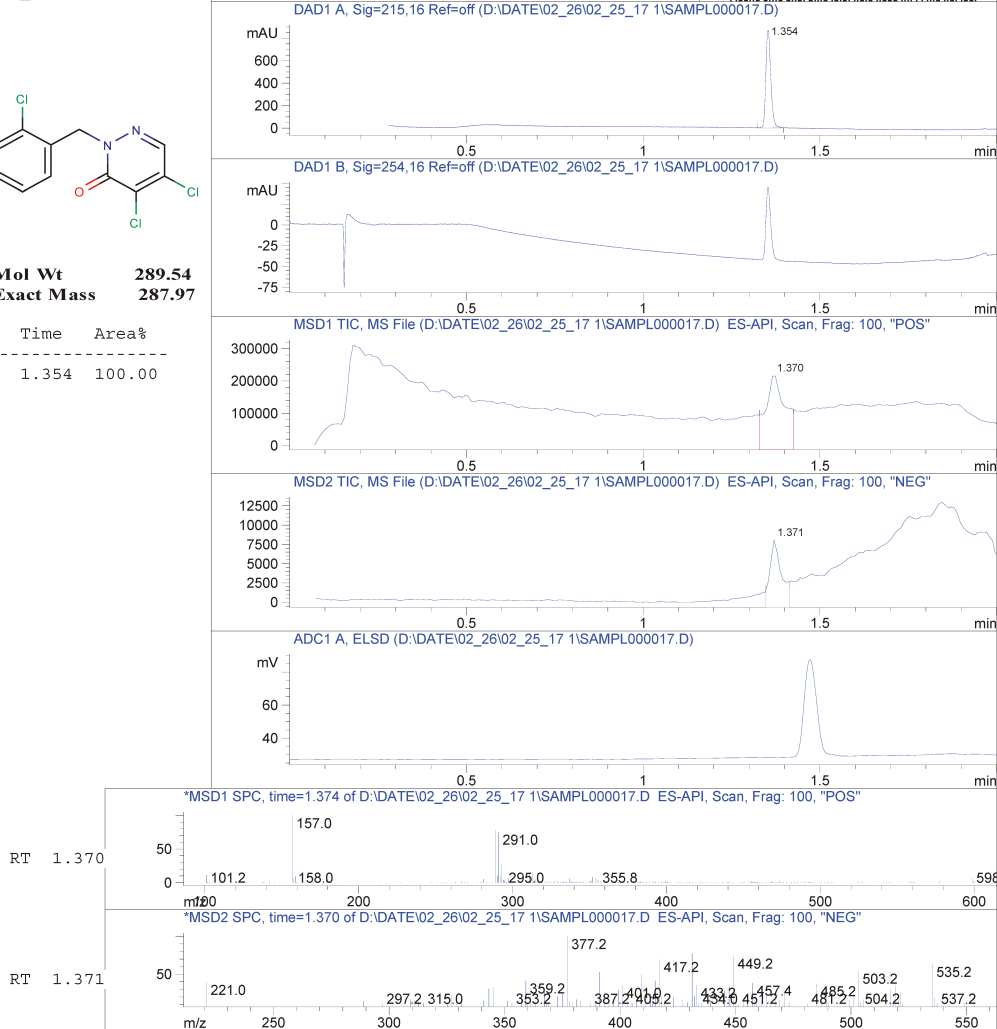





Data File C:\CHEM32\1\DATA\GRAY GROUP\KLEE 2013-05-23 15-45-30\006-0601.D  
Sample Name: 16.6

=====

|                 |   |                      |            |   |        |
|-----------------|---|----------------------|------------|---|--------|
| Acq. Operator   | : |                      | Seq. Line  | : | 6      |
| Acq. Instrument | : | Instrument 1         | Location   | : | Vial 6 |
| Injection Date  | : | 5/23/2013 4:53:34 PM | Inj        | : | 1      |
|                 |   |                      | Inj Volume | : | 2.0 µl |

Acq. Method : C:\CHEM32\1\DATA\GRAY GROUP\KLEE 2013-05-23 15-45-30\KL\_6MIN.M  
Last changed : 5/1/2013 1:16:51 PM by Chang  
Analysis Method : C:\CHEM32\1\DATA\KLEE\KLEE 2013-05-20 11-11-11\KL\_6MIN.M  
Last changed : 5/1/2013 1:16:51 PM by Chang  
Method Info : KL-6min

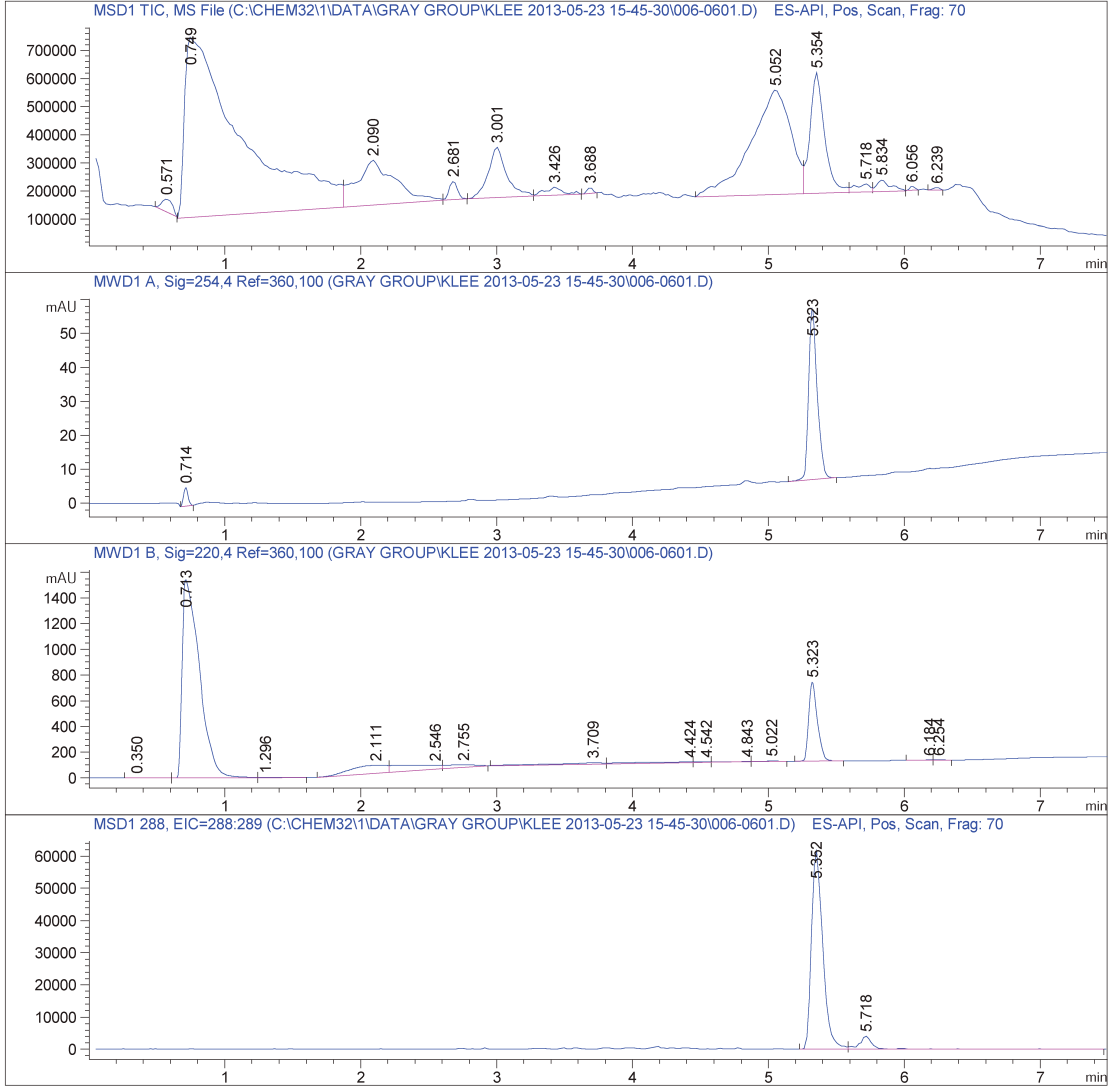

Data File C:\CHEM32\1\DATA\GRAY GROUP\KLEE 2013-05-23 15-45-30\006-0601.D  
Sample Name: 16.6

MS Signal: MSD1 TIC, MS File, ES-API, Pos, Scan, Frag: 70  
Spectra averaged over upper half of peaks.  
Noise Cutoff: 1000 counts.  
Reportable Ion Abundance: > 10%.

| Retention<br>Time (MS) | MS Area  | Mol. Weight<br>or Ion                                                            |
|------------------------|----------|----------------------------------------------------------------------------------|
| 0.571                  | 252420   | 178.95 I<br>157.00 I<br>101.00 I                                                 |
| 0.749                  | 18509582 | 157.00 I<br>137.05 I<br>101.00 I                                                 |
| 2.090                  | 3092101  | 179.00 I<br>157.00 I<br>137.00 I<br>101.00 I                                     |
| 2.681                  | 272354   | 325.20 I<br>324.20 I<br>179.05 I<br>157.00 I<br>137.00 I<br>101.05 I             |
| 3.001                  | 1674163  | 178.95 I<br>157.00 I<br>137.00 I<br>101.00 I                                     |
| 3.426                  | 262883   | 179.00 I<br>157.00 I<br>137.00 I<br>101.00 I                                     |
| 3.688                  | 59491    | 386.95 I<br>179.00 I<br>157.00 I<br>137.00 I<br>101.00 I                         |
| 5.052                  | 7634087  | 157.00 I<br>137.00 I<br>130.20 I<br>101.00 I                                     |
| 5.354                  | 3175239  | 598.75 I<br>418.95 I<br>416.95 I<br>397.00 I<br>395.00 I<br>314.95 I<br>312.90 I |

Data File C:\CHEM32\1\DATA\GRAY GROUP\KLEE 2013-05-23 15-45-30\006-0601.D  
Sample Name: 16.6

|       |        |          |
|-------|--------|----------|
|       |        | 310.90 I |
|       |        | 293.00 I |
|       |        | 291.95 I |
|       |        | 290.90 I |
|       |        | 290.00 I |
|       |        | 288.90 I |
|       |        | 157.00 I |
|       |        | 137.10 I |
|       |        | 101.05 I |
| 5.718 | 222423 | 159.10 I |
|       |        | 157.00 I |
|       |        | 137.00 I |
|       |        | 101.00 I |
| 5.834 | 282075 | 385.20 I |
|       |        | 364.20 I |
|       |        | 363.20 I |
|       |        | 159.05 I |
|       |        | 157.05 I |
|       |        | 137.00 I |
|       |        | 101.00 I |
| 6.056 | 35750  | 157.00 I |
|       |        | 101.00 I |
| 6.239 | 27223  | 157.00 I |
|       |        | 101.10 I |

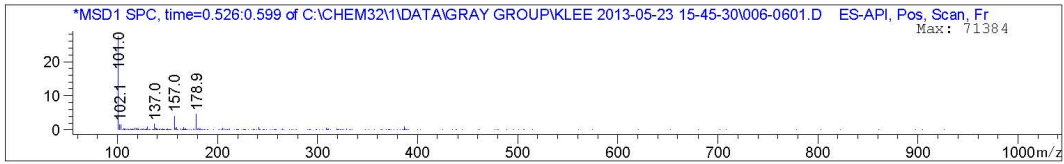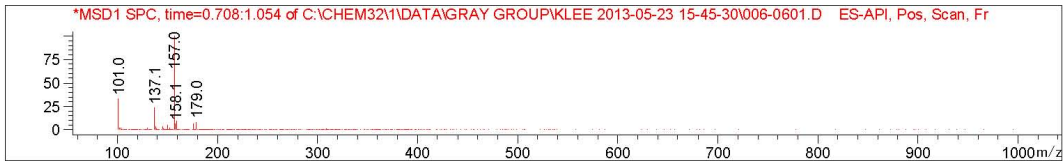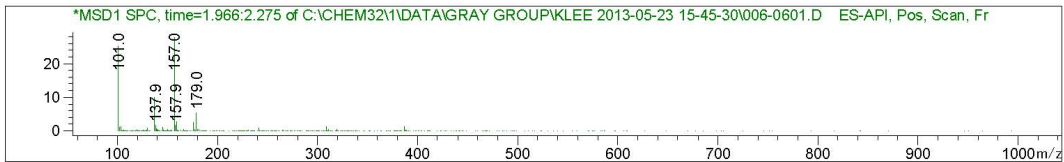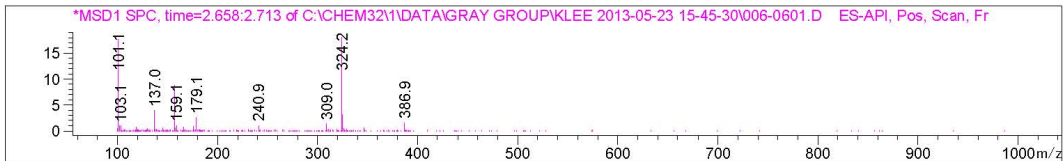

Data File C:\CHEM32\1\DATA\GRAY GROUP\KLEE 2013-05-23 15-45-30\006-0601.D  
Sample Name: 16.6

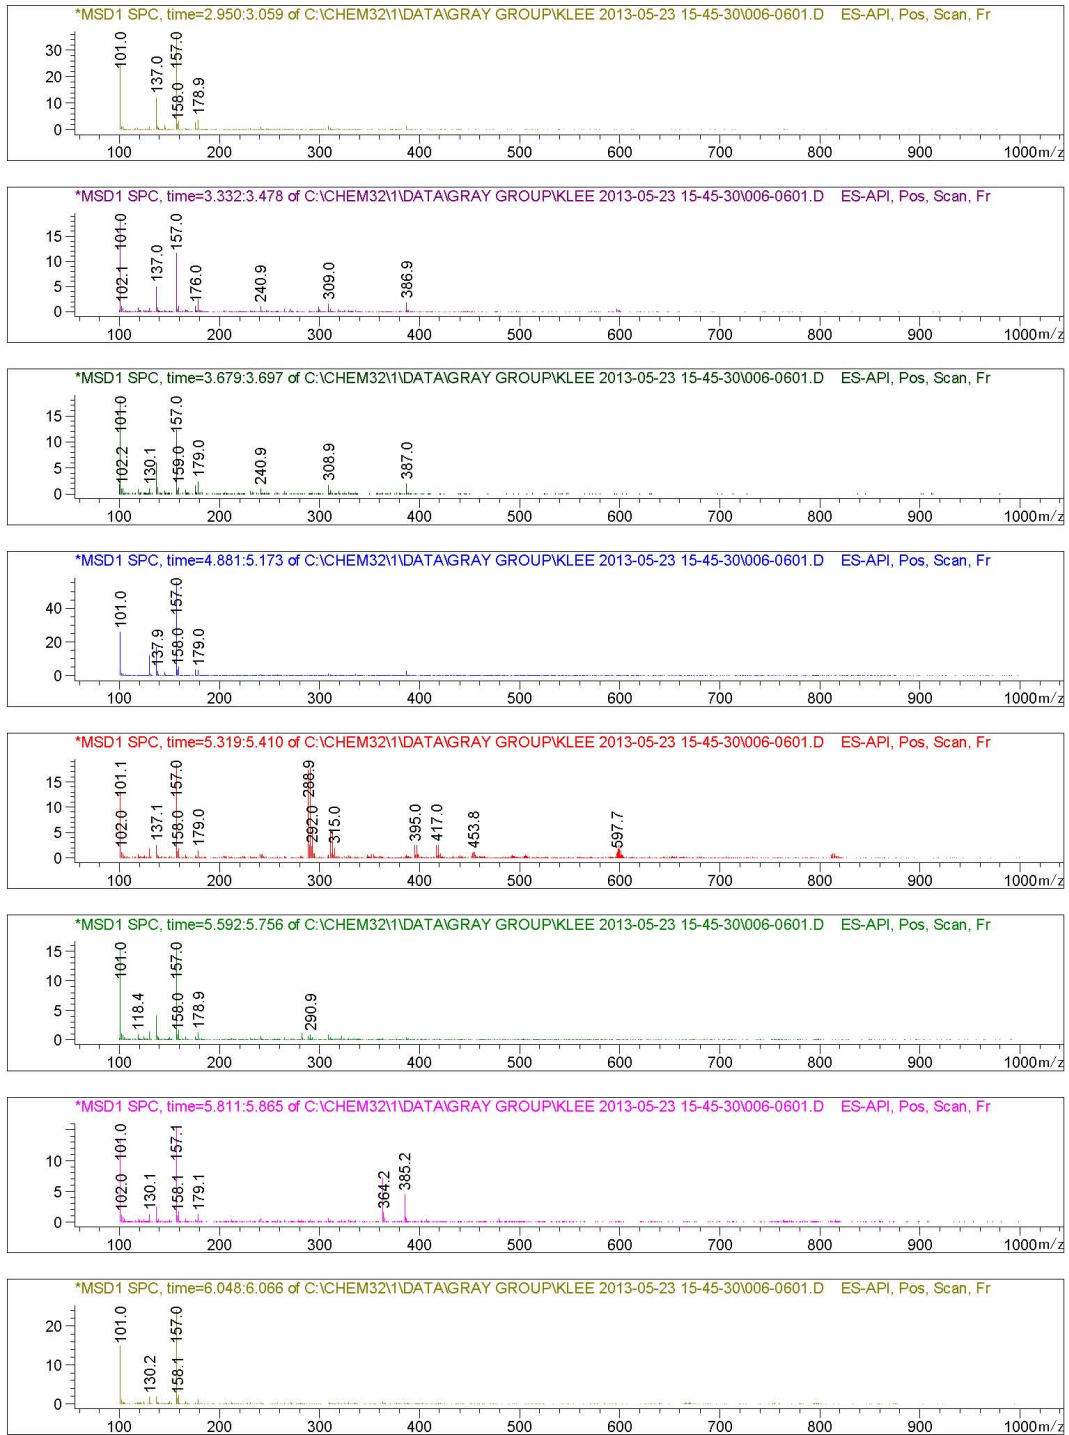

Data File C:\CHEM32\1\DATA\GRAY GROUP\KLEE 2013-05-23 15-45-30\006-0601.D  
Sample Name: 16.6

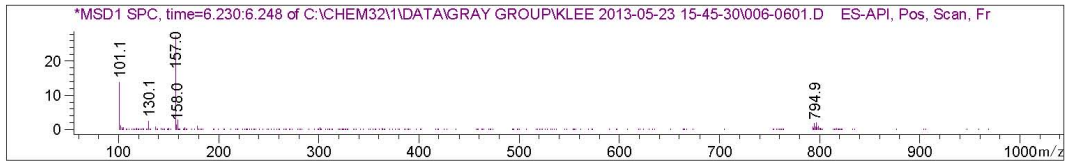

\*\*\* End of Report \*\*\*

### Supplementary analysis of proteins purity.

The purity of the enzymes used in this study is over 95% for the three of them and was assessed by SDS-PAGE (12% acrylamide gels and Coomassie Brilliant Blue staining). A representative image is shown below. The sequences of all of them are also indicated.

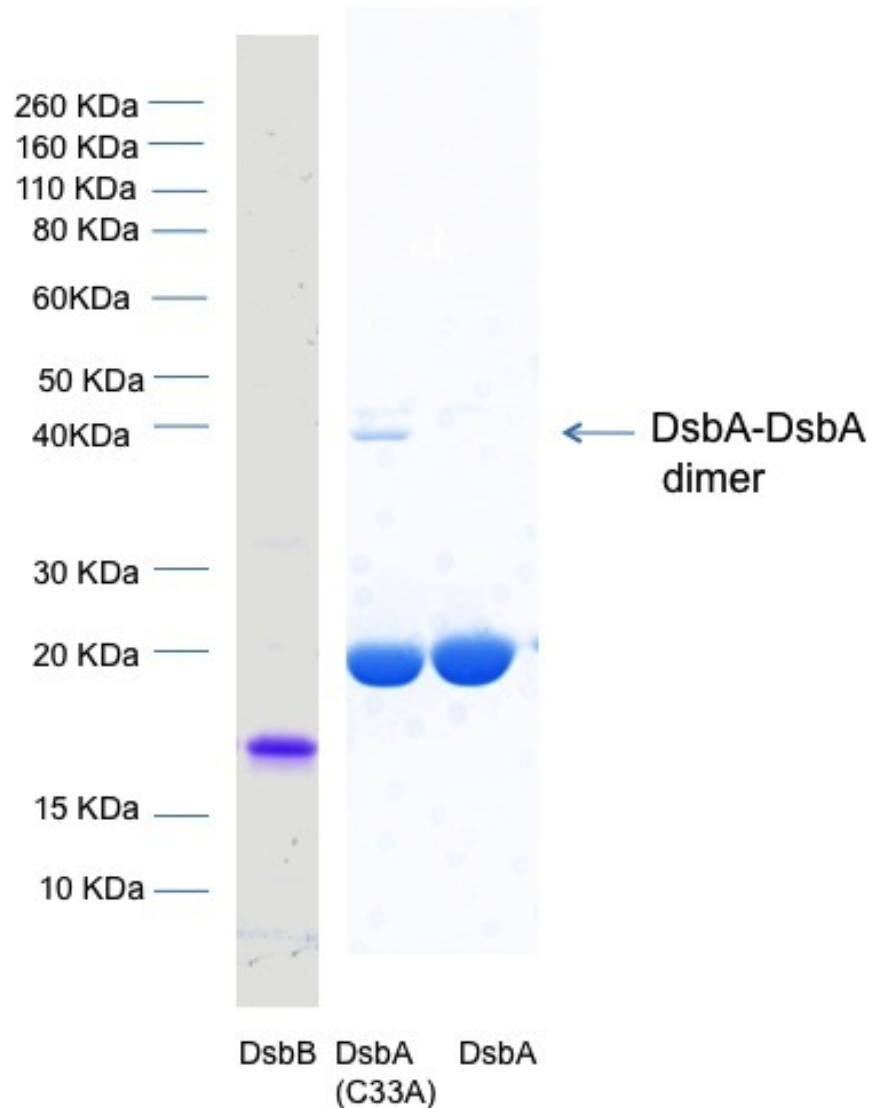

DsbB sequence (2 non-catalytic cysteines mutated)

```
MLRFLNQASQGRGAWLLMAFTALALELTALWFQHVMILLKPCVLCIYERVALFG  
VLGAALIGAIAPKTPLRYVAMVIWLYSAFRGVQLTYEHTMLQLYSPFATCDFMV  
RFPEWLPLDKWVPQVFVASGDCAERQWDFLGLEMPQWLLGIFIAYLIVAVLVVI  
SQPFKAKKRDLFGRRSHHHHHH
```

DsbA sequence

```
MGHHHHHHHAQYEDGKQYTTLEKPVAGAPQVLEFFSFFCPHCYQFEEVLHISDN  
VKKKLPEGVKMTKYHVNFMGGDLGKDLTQAWAVAMALGVEDKVTVPLFEGVQ
```

KTQTIRSASDIRDVFINAGIKGEEYDAAWNSFVVKSLVAQQEKAAADVQLRGVP  
AMFVNGKYQLNPQGMDTSNMDVVFVQQYADTVKYLSEKK

DsbA<sub>C33A</sub> sequence

MGHHHHHAQYEDGKQYTTLEKPVAGAPQVLEFFSFFCPHAYQFEEVLHISDN  
VKKKLPEGVKMTKYHVNFMGGDLGKDLTQAWAVAMALGVEDKVTVPLFEGVQ  
KTQTIRSASDIRDVFINAGIKGEEYDAAWNSFVVKSLVAQQEKAAADVQLRGVP  
AMFVNGKYQLNPQGMDTSNMDVVFVQQYADTVKYLSEKK



**Original and complete pictures of western blots (taken with ChemiDoc of Image Lab 5.2, BIORAD) used to make Figure 2b.**

TOP: cells treated with compound 9

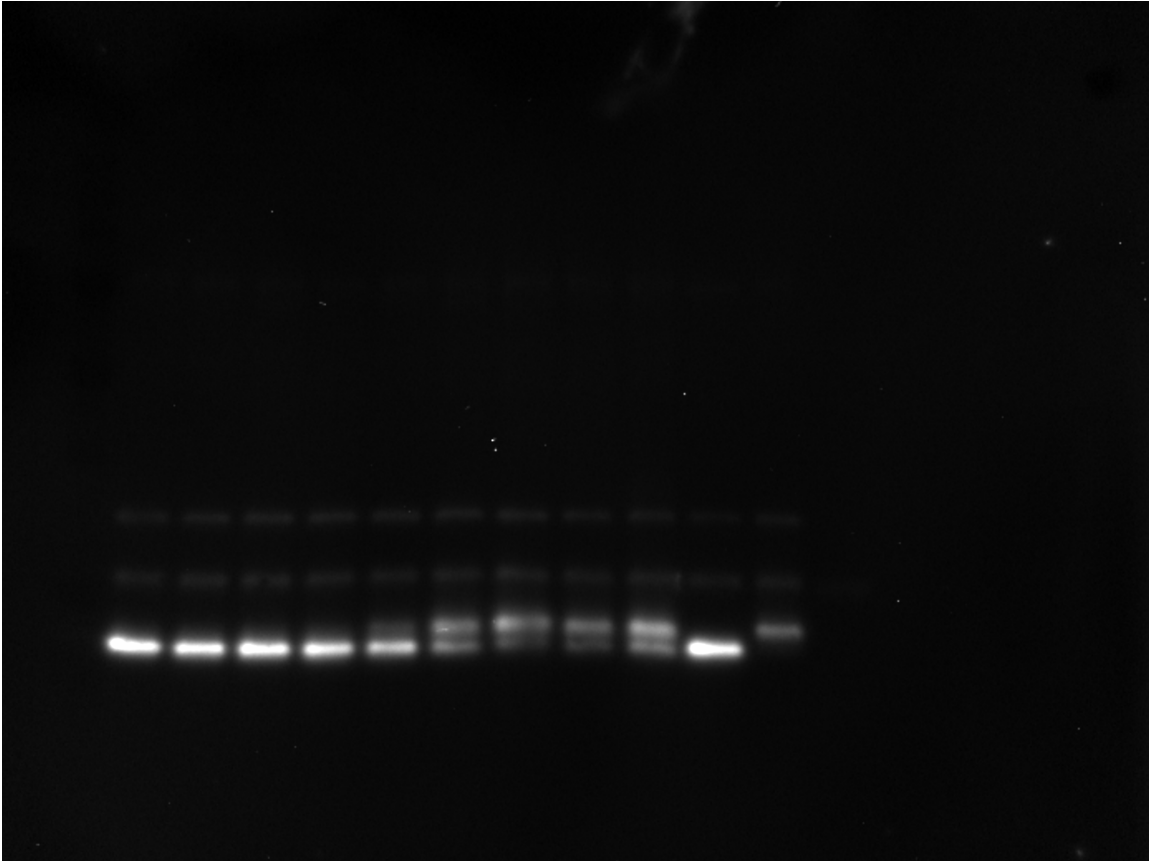

BOTTOM: cells treated with compound 12

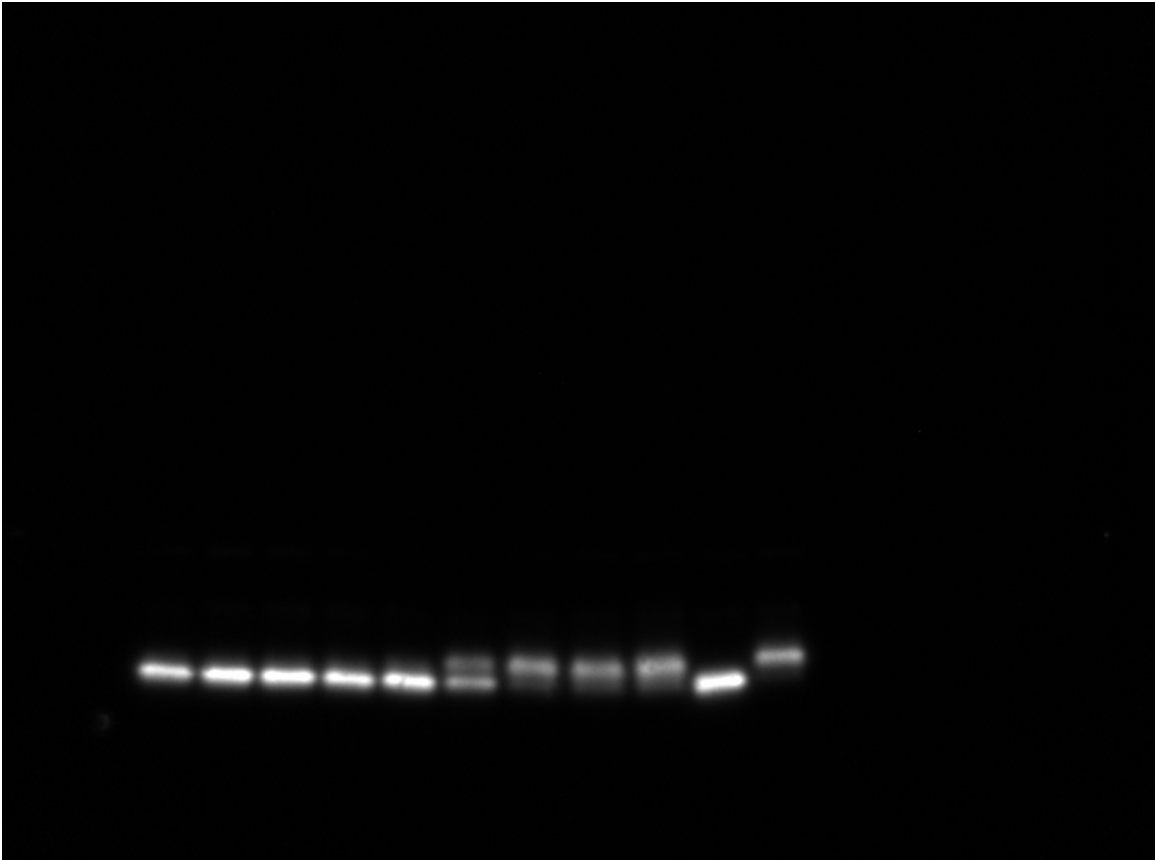

## Supplementary Tables

**Supplementary Table 1.** *M. tuberculosis* growth inhibition by compounds found as *MtbVKOR* and *EcDsbB* candidate inhibitors in the HTS.

| ID No.                                     | Structure                                                                           | <i>Mycobacterium tuberculosis</i> growth (MIC in $\mu\text{M}$ ) in three different media* |          |          |
|--------------------------------------------|-------------------------------------------------------------------------------------|--------------------------------------------------------------------------------------------|----------|----------|
|                                            |                                                                                     | 7H9                                                                                        | 7H9+OADC | Sauton's |
| <b><i>MtbVKOR</i> candidate inhibitors</b> |                                                                                     |                                                                                            |          |          |
| 1                                          | 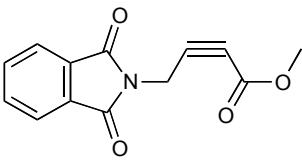   | 128                                                                                        | 510      | 1000     |
| 2                                          |    | 1100                                                                                       | >1100    | >1100    |
| 3                                          |    | >980                                                                                       | >980     | >980     |
| 4                                          |  | 62                                                                                         | 120      | 120      |
| <b><i>EcDsbB</i> candidate inhibitors</b>  |                                                                                     |                                                                                            |          |          |
| 5                                          |  | 470                                                                                        | >940     | 940      |
| 6                                          |  | 900                                                                                        | >900     | 900      |
| 7                                          |  | 500                                                                                        | 1000     | 1000     |

|    |                                                                                   |       |       |       |
|----|-----------------------------------------------------------------------------------|-------|-------|-------|
| 8  | 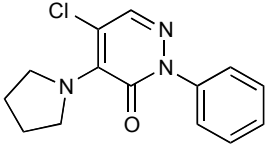 | 450   | 910   | 910   |
| 9  |  | 250   | 490   | 490   |
| 10 |  | >1000 | >1000 | >1000 |
| 11 |  | 57    | 110   | 110   |

\* Minimal inhibitory concentrations are reported from two independent experiments with three replicas each. The MIC was exactly the same in the two independent experiments, except for compound 1 in Sauton's media that was 2 fold different between the two experiments so the highest MIC was reported.

**Supplementary Table 2.** IC50s of candidate inhibitors determined on purified *EcDsbB*.

| ID No.                   | Structure                                                                           | <i>In vitro</i> IC50 ( $\mu\text{M}$ )* |
|--------------------------|-------------------------------------------------------------------------------------|-----------------------------------------|
| <i>EcDsbB</i> inhibitors |                                                                                     |                                         |
| 5                        | 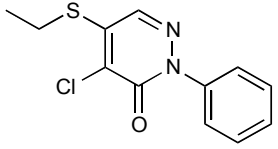   | 9.12 to 15.99                           |
| 6                        |    | 6.69 to 10.29                           |
| 7                        |    | 5.62 to 7.911                           |
| 8                        |   | 7.16 to 9.71                            |
| 10                       |  | 4.87 to 6.12                            |
| 11                       |  | 5.01 to 7.68                            |

\*Results are the 95% confidence intervals of three independent experiments, with exception of compound 11 obtained from two independent experiments.

**Supplementary Table 3.** Strains used in this work.

| <b>Strain</b>                   | <b>Genotype</b>                                                                                                                     | <b>Reference</b> |
|---------------------------------|-------------------------------------------------------------------------------------------------------------------------------------|------------------|
| <i>Escherichia coli</i> strains |                                                                                                                                     |                  |
| HK295                           | MC1000 $\Delta$ ara714 <i>leu</i> <sup>+</sup>                                                                                      | 45               |
| HK320                           | HK295 $\Delta$ dsbB                                                                                                                 | 45               |
| HK314                           | HK295 $\lambda$ att::malF-lacZ102 (Km <sup>r</sup> )                                                                                | H. Kadokura      |
| HK325                           | HK295 $\Delta$ dsbB $\lambda$ att::malF-lacZ102 (Km <sup>r</sup> )                                                                  | H. Kadokura      |
| MER672                          | HK295 $\lambda$ att::malF-lacZ102 (Km <sup>r</sup> ) pTrc99a (Amp <sup>r</sup> ) <i>recA</i> ::Cm                                   | This study       |
| DHB7657                         | HK295 $\Delta$ dsbB $\lambda$ att::malF-lacZ102 (Km <sup>r</sup> ) pTrc99aMtbVKOR (Amp <sup>r</sup> ) <i>recA</i> ::Cm <sup>r</sup> | This study       |
| DHB7658                         | HK295 $\Delta$ dsbB $\lambda$ ::malF-lacZ102 (Km <sup>r</sup> ) pTrc99a (Amp <sup>r</sup> ) <i>recA</i> ::Cm <sup>r</sup>           | This study       |
| DHB7935                         | HK295 $\Delta$ dsbB $\lambda$ att::malF-lacZ102 (Km <sup>r</sup> ) $\phi$ 80::pDSW206dsbB (Amp <sup>r</sup> )                       | This study       |
| DHB7936                         | HK295 $\Delta$ dsbB $\lambda$ att::malF-lacZ102 (Km <sup>r</sup> ) $\phi$ 80::pDSW206 (Amp <sup>r</sup> )                           | This study       |
| CL315                           | HK295 $\lambda$ att::malF-lacZ102 (Km <sup>r</sup> ) $\Delta$ dsbB::Trc204promoter-PadsbB (Amp <sup>r</sup> )                       | This study       |
| CL320                           | HK295 $\lambda$ att::malF-lacZ102 (Km <sup>r</sup> ) $\Delta$ dsbB::Trc204promoter-KpdsbB (Amp <sup>r</sup> )                       | This study       |
| CL377                           | HK295 $\Delta$ dsbB $\lambda$ att::malF-lacZ102 (Km <sup>r</sup> ) pDSW204PadsbH (Amp <sup>r</sup> )                                | This study       |
| CL378                           | HK295 $\Delta$ dsbB $\lambda$ att::malF-lacZ102 (Km <sup>r</sup> ) pDSW204AbdsbB (Amp <sup>r</sup> )                                | This study       |
| CL369                           | HK295 $\Delta$ dsbB $\lambda$ att::malF-lacZ102 (Km <sup>r</sup> ) pDSW204StdsbB (Amp <sup>r</sup> )                                | This study       |
| CL368                           | HK295 $\Delta$ dsbB $\lambda$ att::malF-lacZ102 (Km <sup>r</sup> ) pDSW204Stdsbl (Amp <sup>r</sup> )                                | This study       |
| CL373                           | HK295 $\Delta$ dsbB $\lambda$ att::malF-lacZ102 (Km <sup>r</sup> ) pDSW204VcdsbB (Amp <sup>r</sup> )                                | This study       |
| CL370                           | HK295 $\Delta$ dsbB $\lambda$ att::malF-lacZ102 (Km <sup>r</sup> ) pDSW204FtdsbB (Amp <sup>r</sup> )                                | This study       |
| CL371                           | HK295 $\Delta$ dsbB $\lambda$ att::malF-lacZ102 (Km <sup>r</sup> ) pDSW204HidsbB (Amp <sup>r</sup> )                                | This study       |
| CL379                           | HK295 $\Delta$ dsbB $\lambda$ att::malF-lacZ102 (Km <sup>r</sup> ) pDSW204                                                          | This study       |
| CL396                           | HK320 pCL68 (Sp <sup>r</sup> )                                                                                                      | This study       |
| CL397                           | HK320 pCL75 (Sp <sup>r</sup> )                                                                                                      | This study       |

|       |                                |            |
|-------|--------------------------------|------------|
| CL398 | HK320 pCL73 (Sp <sup>r</sup> ) | This study |
| CL399 | HK320 pCL74 (Sp <sup>r</sup> ) | This study |

---

|                                      |                                          |                        |
|--------------------------------------|------------------------------------------|------------------------|
| <i>Pseudomonas aeruginosa</i> strain |                                          |                        |
| PA14                                 | <i>Pseudomonas aeruginosa</i> UCBPP-PA14 | S. Lory Lab collection |

---

|                                        |                                                                                |    |
|----------------------------------------|--------------------------------------------------------------------------------|----|
| <i>Mycobacterium smegmatis</i> strains |                                                                                |    |
| RD263                                  | <i>M. smegmatis</i> Dvkor transformed with pRD43 (pTetG- <i>E. coli dsbB</i> ) | 12 |
| RD265                                  | <i>M. smegmatis</i> Dvkor transformed with pRD42 (pTetG- <i>Mtb vkor</i> )     | 12 |

---

|          |                                                                                               |            |
|----------|-----------------------------------------------------------------------------------------------|------------|
| Plasmids |                                                                                               |            |
| pTrc99a  | Expression vector, Amp <sup>r</sup>                                                           | 46         |
| pDSW206  | Promoter down mutation in -10 and -35 of pTrc99A                                              | 42         |
| pDSW204  | Promoter down mutation in -35 of pTrc99A                                                      | 42         |
| pHK517   | pAM238 with <i>dsbB</i> -his <sub>6</sub> -c-myc (DsbB <sub>C9A,C49V</sub> ), Sp <sup>r</sup> | 45         |
| pKD46    | Encodes lambda Red genes under arabinose promoter, Amp <sup>r</sup>                           | 47         |
| pNG102   | <i>malF-lacZ</i> 102 fusion, Kan <sup>r</sup>                                                 | 14         |
| pRD33    | pTrc99a-his <i>Mtb</i> VKOR                                                                   | 12         |
| pDHB7933 | pDSW206- <i>dsbB</i> -his <sub>6</sub> -c-myc                                                 | This study |
| pCL58    | pKD46 Ampicillin cassette replaced by Chloramphenicol cassette, Cm <sup>r</sup>               | This study |
| pCL25    | pDSW204P <i>adsbB</i> ( <i>Pseudomonas aeruginosa</i> PA14 <i>dsbB</i> gene, PA14_07000)      | This study |
| pCL26    | pDSW204P <i>adsbH</i> ( <i>Pseudomonas aeruginosa</i> PA14 <i>dsbH</i> gene, PA14_69400)      | This study |
| pCL24    | pDSW204K <i>pdsbB</i> ( <i>Klebsiella pneumoniae</i> W63917 <i>dsbB</i> gene)                 | This study |
| pCL27    | pDSW204A <i>bdsbB</i> ( <i>Acinetobacter baumannii</i> A118 <i>dsbB</i> gene)                 | This study |
| pCL62    | pDSW204S <i>tdsbB</i> ( <i>Salmonella typhimurium</i> LT2 <i>dsbB</i> gene, STM1807)          | This study |
| pCL61    | pDSW204S <i>tdsbl</i> ( <i>Salmonella typhimurium</i> LT2 <i>dsbl</i> gene, STM3194)          | This study |
| pCL66    | pDSW204V <i>cdsbB</i> ( <i>Vibrio cholerae</i> N16961 <i>dsbB</i> gene, VC1902)               | This study |
| pCL63    | pDSW204F <i>tdsbB</i> ( <i>Francisella tularensis</i> 1670 <i>dsbB</i> gene, FTL1670)         | This study |

|       |                                                                                   |            |
|-------|-----------------------------------------------------------------------------------|------------|
| pCL64 | pDSW204HidsbB ( <i>Haemophilus influenzae</i><br>RdKW20 <i>dsbB</i> gene, HI0428) | This study |
| pCL68 | pHK517 <i>dsbB</i> -C41S                                                          | This study |
| pCL75 | pHK517 <i>dsbB</i> -C41S,C44S                                                     | This study |
| pCL73 | pHK517 <i>dsbB</i> -C41S,C44S, C104S                                              | This study |
| pCL74 | pHK517 <i>dsbB</i> -C41S,C44S,C104S,C130S                                         | This study |



**Supplementary Table 4.** Primers used in this work.

| <b>Name</b> | <b>Gene</b> | <b>Sequence</b>                                                        | <b>Restriction sites</b> |
|-------------|-------------|------------------------------------------------------------------------|--------------------------|
| CI16        | KpdsbB-1    | gcg <u>ttcatgat</u> gttgcaatatttaaaccagtgctca                          | BspHI                    |
| CI17        | KpdsbB-2    | cggagctc <u>ttaacg</u> accaaacagatcgcggt                               | SacI                     |
| CI3         | PadsbB-1    | tcgaagct <u>ttcagg</u> cggtgcggcggcc                                   | HindIII                  |
| CI10        | PadsbB-2    | gctgt <u>catgag</u> cagcgctctcctcaa                                    | BspHI                    |
| CL5         | PadsbH-1    | cagaagct <u>ttcagg</u> cacgctcgaggaggaac                               | HindIII                  |
| CI9         | PadsbH-2    | ctccatggtgcccctggccagcccc                                              | NcoI                     |
| CI19        | AbdsbB-1    | ctccatggtgcgattaagtaccgtttgg                                           | NcoI                     |
| CI20        | AbdsbB-2    | cggagctc <u>ttaact</u> tttagccgtcttaa                                  | SacI                     |
| CI92        | StdsbB-1    | gactccatggtgcccattatttcattcccgctagtggcg                                | NcoI                     |
| CI93        | StdsbB-2    | cgtcggatccgatgtatttaataatacaccttttaactactggc                           | BamHI                    |
| CI90        | StdsbI-1    | gactccatggtgccaacggcaagtaccttatctatacca                                | NcoI                     |
| CI91        | StdsbI-2    | cgtcggatccctcggttcagttcaagaacgacgaata                                  | BamHI                    |
| CI94        | VcdsbB-1    | gactccatggtgcaattcaattgaaactgaaactaatcca                               | NcoI                     |
| CI95        | VcdsbB-2    | cgtcggatccctaaacagcagaaacaacaaaagtaa                                   | BamHI                    |
| CI100       | FtdsbB-1    | gactccatggtgcaaaactcagaaacacgctaaagcagc                                | NcoI                     |
| CI101       | FtdsbB-2    | cgtcggatccagttcttttgcttgagttatttttgttaa                                | BamHI                    |
| CI96        | HidsbB-1    | gactccatggtgcccctggctattgaattttttaccag                                 | NcoI                     |
| CI97        | HidsbB-2    | cgtcggatccctagcaaaaacagttaccggtgaata                                   | BamHI                    |
| CI65        | Ins ΔdsbB-1 | attccggggatccgctgacctgcagttcgaagttcctattctcatctaaagtatatatgagtaaactgg  | -                        |
| CI66        | Ins ΔdsbB-2 | ttagtgtaggctggagctgcttcgaagttcctataactttctaccgggagctgcatgtgtcagaggtttc | -                        |

**Supplementary Table 5.** Small molecule screening data

| Category | Parameter           | Description                                                                                                                                                                                                                                                                                                                                          |
|----------|---------------------|------------------------------------------------------------------------------------------------------------------------------------------------------------------------------------------------------------------------------------------------------------------------------------------------------------------------------------------------------|
| Assay    | Type of assay       | Organism cell-based assay.                                                                                                                                                                                                                                                                                                                           |
|          | Target              | <i>Escherichia coli</i> DsbB enzyme (UniProtKB ID: P0A6M2).<br><i>Mycobacterium tuberculosis</i> VKOR enzyme.                                                                                                                                                                                                                                        |
|          | Primary measurement | Detection of $\beta$ -galactosidase activity using X-Gal.                                                                                                                                                                                                                                                                                            |
|          | Key reagents        | 384-well tissue culture-treated plates (BD Falcon #353961).<br>M63 medium containing 0.2% glucose and 0.9% agar, supplemented with kanamycin (40 $\mu$ g/mL), ampicillin (50 $\mu$ g/mL), IPTG (1 mM), and X-Gal (120 $\mu$ g/mL). Breathable sealing film (Axygen BF-400).                                                                          |
|          | Assay protocol      | See Agar Screening in Online Methods.                                                                                                                                                                                                                                                                                                                |
|          | Additional comments | The medium was maintained at 57 °C by a water bath throughout the pouring process.<br>The Wellmate tubing was pre-warmed by washing with sterile hot water immediately prior to loading the agar medium.<br>The plates were incubated in humidified boxes (i.e, plastic boxes with small containers of water and paper towels) and were not stacked. |
| Library  | Library size        | Complete ICCB-library: 663,363 small-molecule compounds.<br>Screened ICCB-library: 50,374 compounds.<br>Screened NIAID-library: 1,113 compounds.                                                                                                                                                                                                     |
|          | Library composition | The ICCB-library used in the screening contained mostly commercial libraries and small libraries of known bioactive and natural product extracts. See Online Methods.                                                                                                                                                                                |
|          | Source              | Institute for Chemistry and Chemical Biology (ICCB) Longwood. Harvard Medical School.<br>National Institute of Allergy and Infectious Diseases (NIAID).                                                                                                                                                                                              |
|          | Additional comments | <a href="http://iccb.med.harvard.edu/libraries/compound-libraries/">http://iccb.med.harvard.edu/libraries/compound-libraries/</a>                                                                                                                                                                                                                    |
| Screen   | Format              | 384-well plate format.                                                                                                                                                                                                                                                                                                                               |

|                   |                                          |                                                                                                                                                                                                                                                                                                                                                                                                                                                                                       |
|-------------------|------------------------------------------|---------------------------------------------------------------------------------------------------------------------------------------------------------------------------------------------------------------------------------------------------------------------------------------------------------------------------------------------------------------------------------------------------------------------------------------------------------------------------------------|
|                   | Concentration(s) tested                  | Concentration of library: 5 mg/mL ( $\approx$ 10-20 mM)<br>Amount of compound used: 0.5 $\mu$ g (0.1 $\mu$ L)<br>Estimated final concentration of compound 8.3 ng/ $\mu$ L ( $\approx$ 16.7 $\mu$ M)<br>Final concentration of DMSO: 0.16%                                                                                                                                                                                                                                            |
|                   | Plate controls                           | Positive control: <i>Escherichia coli</i> DsbB mutant.<br>Negative control: DMSO.                                                                                                                                                                                                                                                                                                                                                                                                     |
|                   | Reagent/compound dispensing system       | EPSON compound transfer robot.                                                                                                                                                                                                                                                                                                                                                                                                                                                        |
|                   | Detection instrument and software        | The readout of the assay is a blue-color well; the detection is done by eye.                                                                                                                                                                                                                                                                                                                                                                                                          |
|                   | Assay validation/QC                      | NA                                                                                                                                                                                                                                                                                                                                                                                                                                                                                    |
|                   | Correction factors                       | NA                                                                                                                                                                                                                                                                                                                                                                                                                                                                                    |
|                   | Normalization                            | NA                                                                                                                                                                                                                                                                                                                                                                                                                                                                                    |
|                   | Additional comments                      |                                                                                                                                                                                                                                                                                                                                                                                                                                                                                       |
| Post-HTS analysis | Hit criteria                             | Hits were categorized as strong (dark blue), medium (medium blue), weak (light blue) and very weak (very light blue).                                                                                                                                                                                                                                                                                                                                                                 |
|                   | Hit rate                                 | 0.29% for VKOR inhibitors and 0.021% for DsbB inhibitors.                                                                                                                                                                                                                                                                                                                                                                                                                             |
|                   | Additional assay(s)                      | Compounds were re-tested in a cherry pick assay. See Online Methods.                                                                                                                                                                                                                                                                                                                                                                                                                  |
|                   | Confirmation of hit purity and structure | Compounds were purchased from ChemBridge (San Diego, CA); Asinex Ltd. (Moscow, Russia); Sequoia Research Products Ltd. (Pangbourne, UK); Key Organics Ltd. (Camelford, UK); AK Scientific (Union City, CA); Ambinter (Orleans, France); Ryan Scientific (Mt. Pleasant, SC); Enamine (Ukraine).<br>All purchased compounds were analyzed by mass spectrometry to verify the molecular weights and to estimate purity (ICCB-Longwood). See compound resupply section in Online Methods. |
|                   | Additional comments                      | <a href="#">EcDsbB data.csv</a><br><a href="#">MtbVKOR data.csv</a>                                                                                                                                                                                                                                                                                                                                                                                                                   |
